# Supplementary material for: UTP11 promotes the growth of hepatocellular carcinoma by enhancing the mRNA stability of Oct4
Source: Springer Nature journal article supplement (doi:10.1186/s12885-023-11794-2), 2024-01-17
Supplement: MOESM1 [file 26636192]

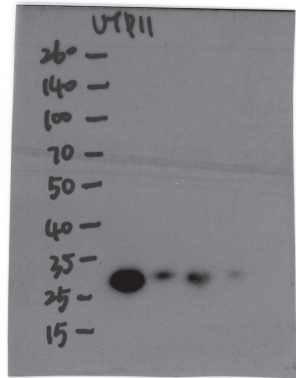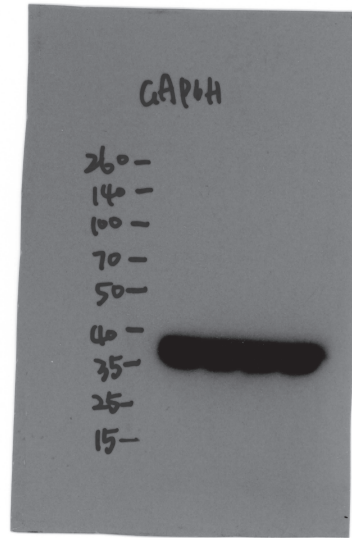

Figure 3C

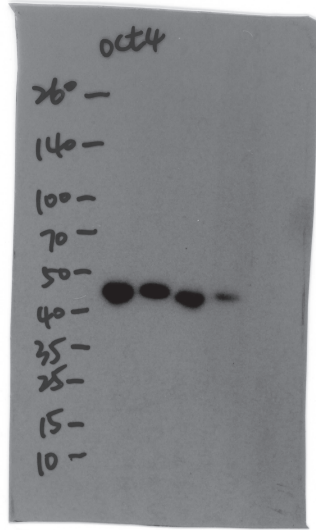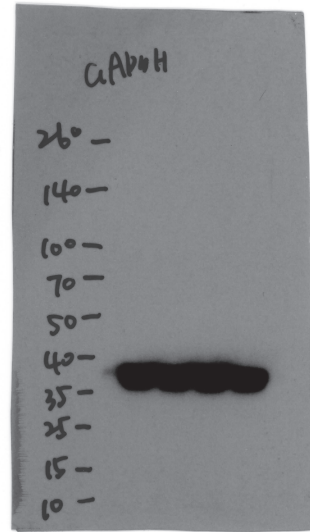

Figure 7F
